# Supplementary material for: Baseline Levels of Serum Progesterone and the First Trimester Pregnancy Outcome in Women with Threatened Abortion: A Retrospective Cohort Study
Source: Hindawi journal article supplement (doi:10.1155/2020/8780253), 2020-01-01

Schedule 1: the trend of progesterone over times of measurements in threatened abortion patients

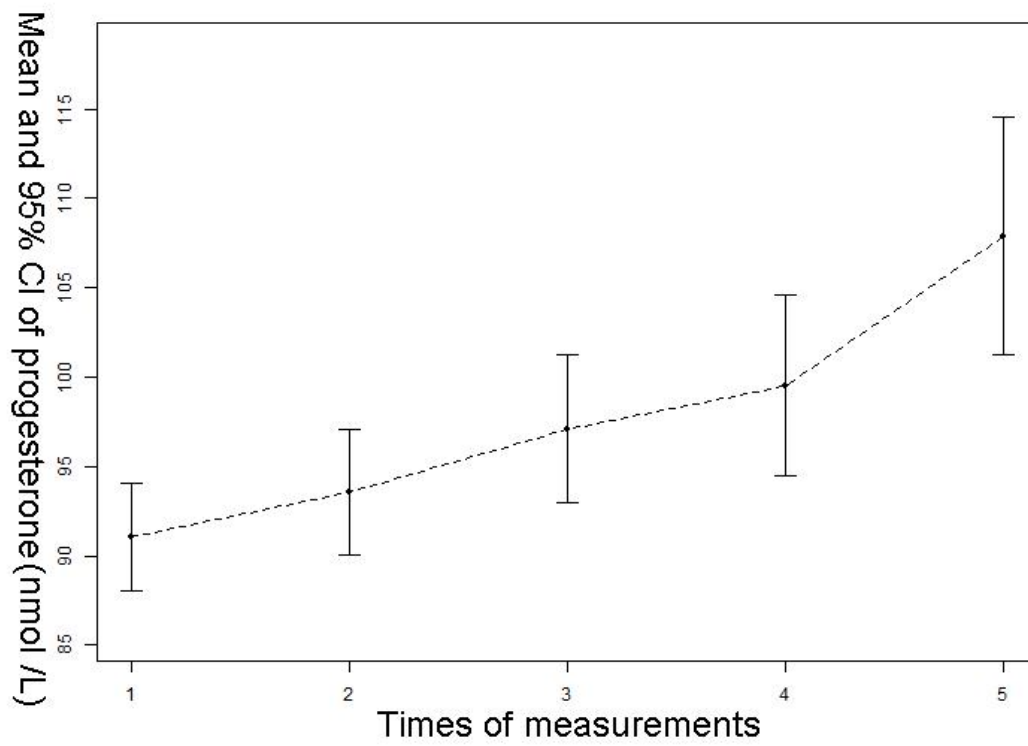

Schedule 2: the trend of progesterone over times of measurements in threatened abortion patients who continued pregnancy

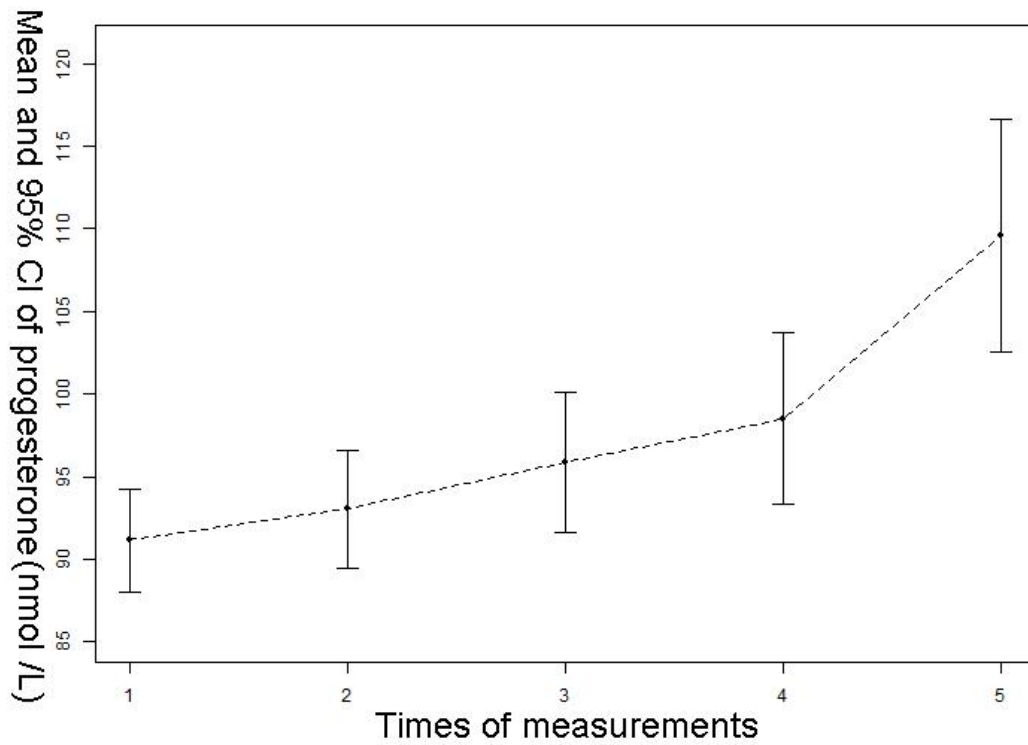

Schedule 3: the trend of progesterone over times of measurements in threatened abortion patients who miscarry within 12 weeks

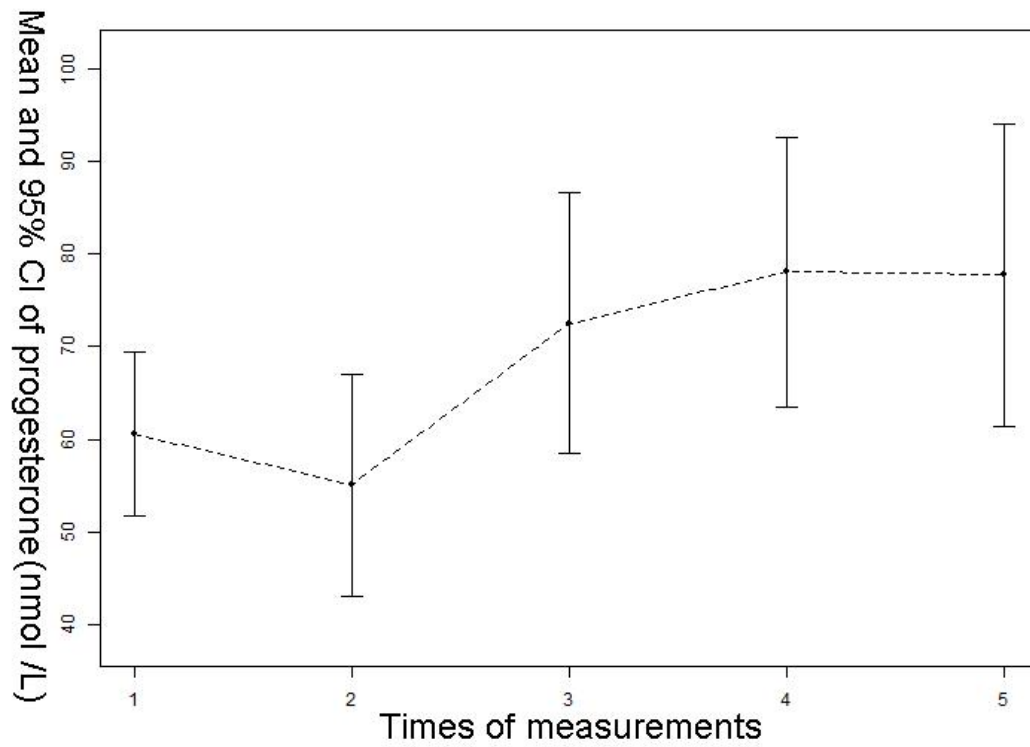

Schedule 4: the trend of  $\beta$ -HCG over times of measurements in threatened abortion patients

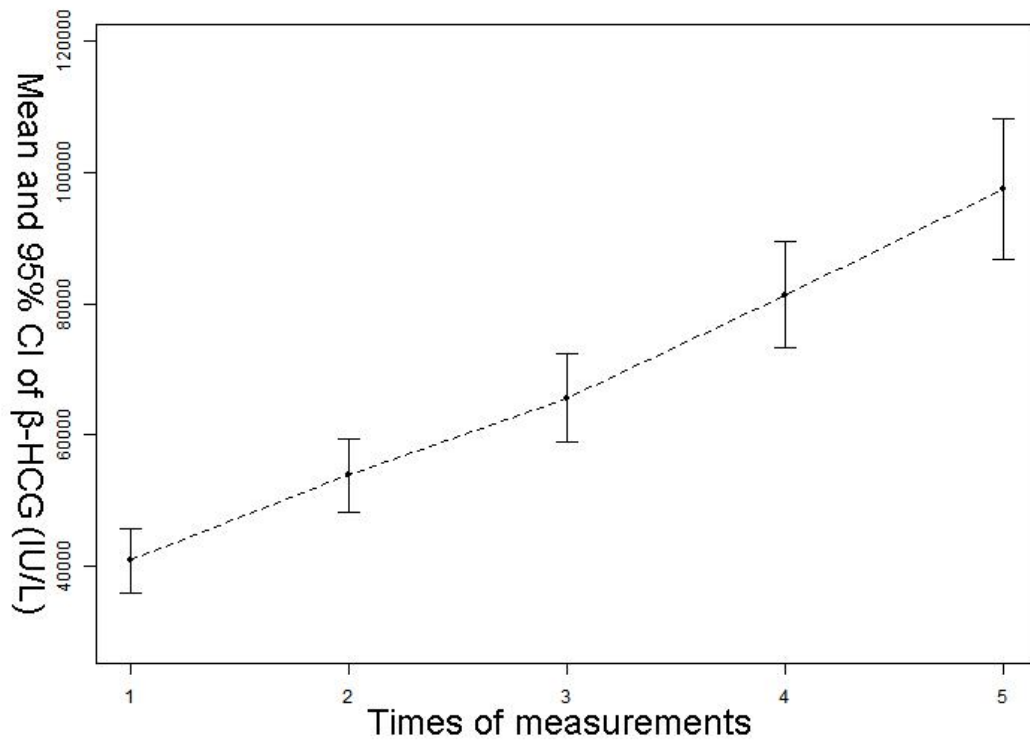

Schedule 5: the trend of  $\beta$ -HCG over times of measurements in threatened abortion patients who continued pregnancy

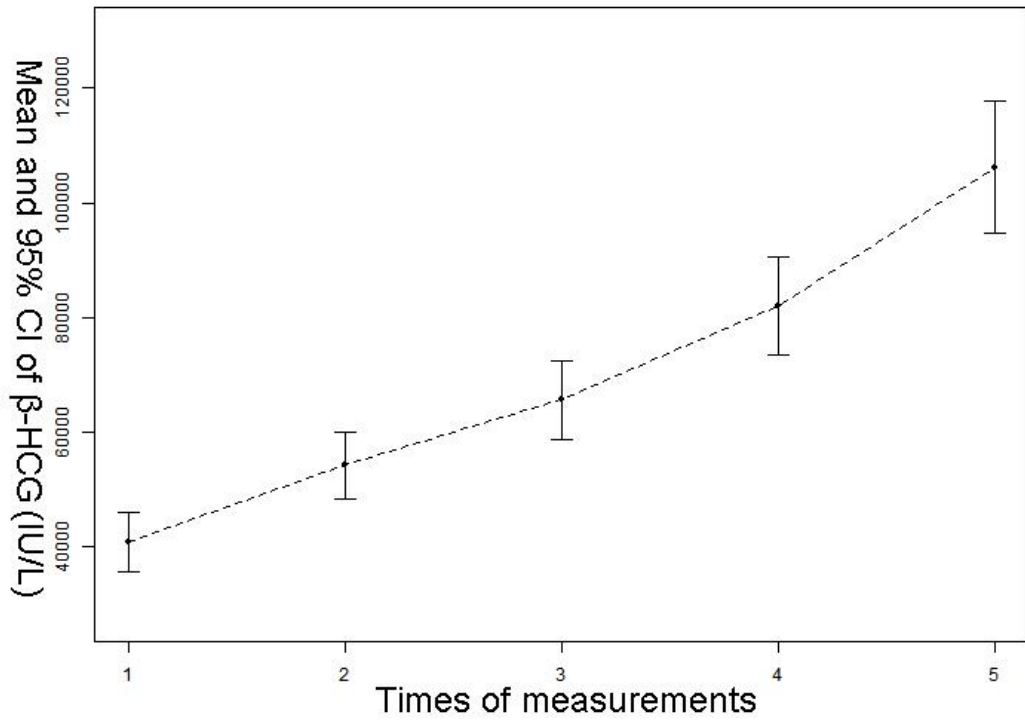

Schedule 6: the trend of  $\beta$ -HCG over times of measurements in threatened abortion patients who miscarriage within 12 weeks

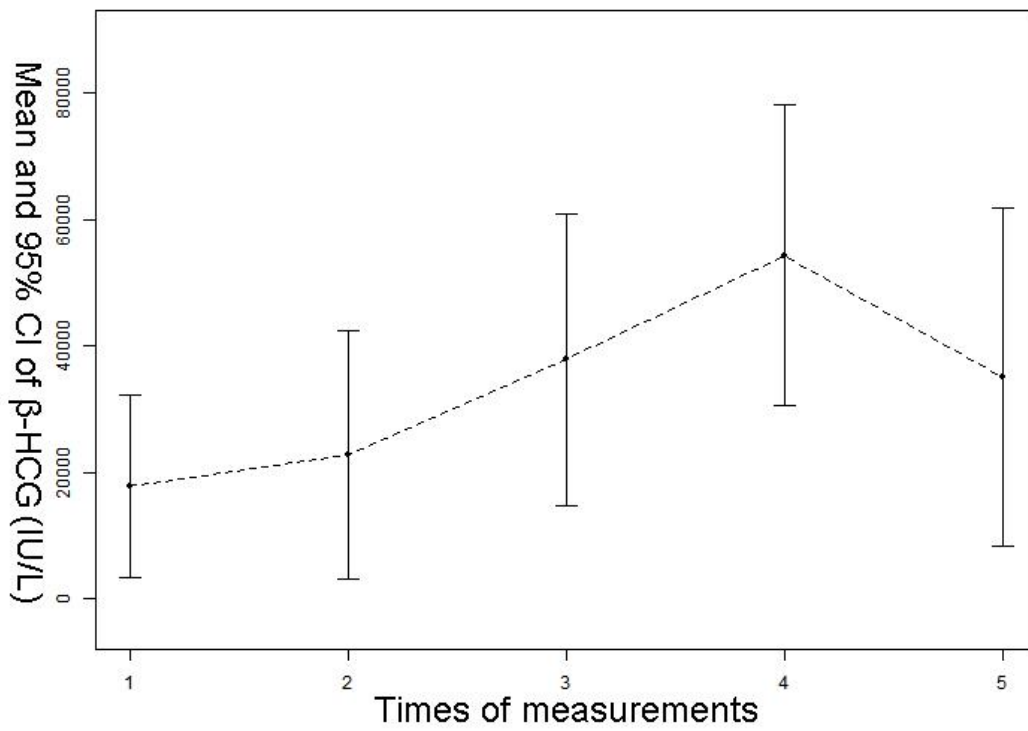

Supplement: f1 [file 8780253.f1.pdf]
